# Supplementary material for: Endometrial Mesenchymal Stem/Stromal Cells Modulate the Macrophage Response to Implanted Polyamide/Gelatin Composite Mesh in Immunocompromised and Immunocompetent Mice
Source: PubMed Central journal article supplement (PMC5919927; doi:10.1038/s41598-018-24919-6), 2018-04-26
Supplement: 41598_2018_24919_MOESM1_ESM.pdf [file 41598_2018_24919_MOESM1_ESM.pdf]

# Endometrial Mesenchymal Stem/Stromal Cells Modulate the Macrophage Response to Implanted Polyamide/Gelatin Composite Mesh in Immunocompromised and Immunocompetent Mice

Darzi S<sup>a,b</sup>, Deane JA<sup>a,b</sup>, Nold CA<sup>a</sup>, Edwards S<sup>c</sup>, Gough DJ<sup>a</sup>,  
Mukherjee S<sup>a</sup>, Gurung S<sup>a,b</sup>, Tan KS<sup>a</sup>, Vashi AV<sup>c</sup>, Werkmeister JA<sup>a,b,c</sup>,  
Gargett CE<sup>a,b\*</sup>

- a. The Ritchie Centre, Hudson Institute of Medical Research, 27–31 Wright Street, Clayton, Victoria 3168, Australia
- b. Department of Obstetrics and Gynaecology, Monash University, Clayton, Victoria 3168, Australia,
- c. CSIRO Manufacturing, Bayview Avenue, Clayton, Victoria 3169, Australia

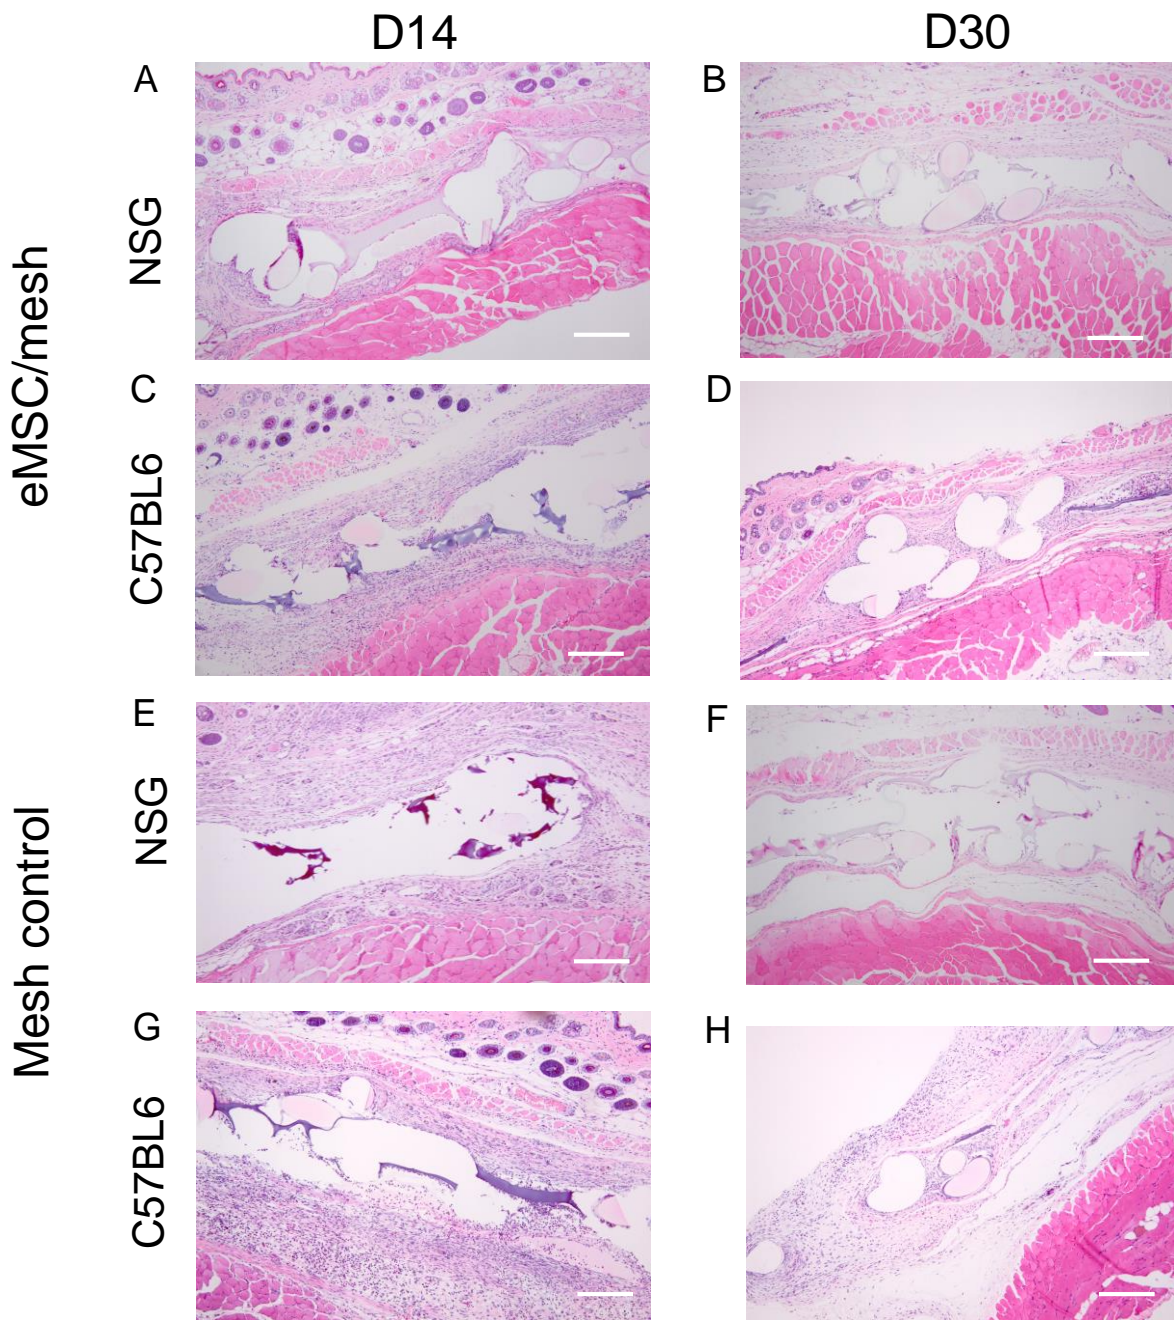

**Supplementary Figure 1. H&E staining of explanted tissue at day 14 and 30.**

(A, B) H&E staining on explanted tissue from NSG mice and (C, D) from C57BL6 mice, implanted with eMSC/mesh. (E, F) H&E staining on explanted tissue from NSG mice and (G, H) from C57BL6 mice implanted with mesh only. Scale Bars 200  $\mu$ m.
